# Supplementary material for: Composition, Distribution, and Attribution of Hydrochemistry in Drainage Systems in the North of Tianshan Mountains, China
Source: MDPI journal article supplement (doi:10.3390/atmos14071116), 2023-07-05
Supplement: s1 [file s1]

## Supplementary Materials:

Jia-Xin Zhang, Bing-Qi Zhu

**Table S1.** Physical and chemical parameters of water samples collected in northern of the Tianshan Mountains, China. (Note: 1 water type: SFW or SW, surface water samples including river water, lake water, reservoirs water, pond water, stream water, snow, ice, rainfall, etc.; PGW or PW, phreatic groundwater samples with groundwater level depth < 50 m; CGW or CW, confined groundwater samples with groundwater level depth > 50 m or > 100 m. 2 Watershed: EQS, Erlqis watershed; YL, Yili watershed; JG: Junggar watershed; YL-TKS, Tekes Basin in Yili watershed; YL-GNS, Gongnais Basin in Yili; YL-KS, Kashi Basin in Yili; YL-YL, Yili Basin in Yili; JG-THB, Tuha Basin in JG; JG-MNSTB, middle part of the north slope of Tianshan Mountains in JG; JG-ABB, Aibi Lake Basin in JG; JG-EMB, Ermin Basin in JG; WLGB, Wulungu Basin in JG. The specific location and distribution of each sampling site are shown in Fig. 3.)

| Sampl<br>e-ID | Water<br>shed | Water<br>type | Temp<br>(°C) | pH   | TDS<br>(mg/L) | K <sup>+</sup><br>(mg/L) | Na <sup>+</sup><br>(mg/L) | Mg <sup>2+</sup><br>(mg/L) | Ca <sup>2+</sup><br>(mg/L) | HCO <sub>3</sub> <sup>-</sup><br>(mg/L) | SO <sub>4</sub> <sup>2-</sup><br>(mg/L) | Cl <sup>-</sup><br>(mg/L) |
|---------------|---------------|---------------|--------------|------|---------------|--------------------------|---------------------------|----------------------------|----------------------------|-----------------------------------------|-----------------------------------------|---------------------------|
| EQ01          | EQS           | SFW           | /            | 7.00 | 41.6          | 0.8532                   | 2.409                     | 1.546                      | 6.218                      | 18.58                                   | 4.593                                   | 6.009                     |
| EQ02          | EQS           | SFW           | /            | 7.61 | 153.0         | 1.291                    | 6.464                     | 2.943                      | 32.74                      | 24.62                                   | 83.40                                   | 3.164                     |
| EQ03          | EQS           | SFW           | /            | 7.58 | 199.0         | 1.500                    | 13.04                     | 5.026                      | 37.30                      | 50.12                                   | 92.14                                   | 7.912                     |
| EQ04          | EQS           | SFW           | /            | 7.73 | 158.0         | 2.019                    | 14.40                     | 4.729                      | 19.69                      | 68.95                                   | 37.37                                   | 8.497                     |
| EQ05          | EQS           | SFW           | /            | 7.03 | 43.90         | 1.209                    | 4.051                     | 1.507                      | 6.141                      | 17.46                                   | 8.805                                   | 5.400                     |
| EQ06          | EQS           | SFW           | /            | 7.34 | 38.70         | 0.8540                   | 2.838                     | 1.330                      | 5.449                      | 12.89                                   | 9.484                                   | 4.187                     |
| EQ07          | EQS           | SFW           | /            | 7.83 | 183.0         | 3.093                    | 9.663                     | 6.301                      | 26.20                      | 90.51                                   | 41.41                                   | 3.371                     |
| EQ08          | EQS           | SFW           | /            | 7.61 | 87.00         | 1.833                    | 3.517                     | 3.525                      | 12.34                      | 60.19                                   | 3.163                                   | 2.243                     |
| EQ09          | EQS           | SFW           | /            | 7.90 | 126.0         | 2.148                    | 3.494                     | 6.660                      | 17.24                      | 86.50                                   | 6.127                                   | 2.817                     |
| EQ10          | EQS           | SFW           | /            | 7.23 | 24.60         | 1.395                    | 2.487                     | 0.5481                     | 2.673                      | 10.24                                   | 2.601                                   | 4.124                     |
| EQ11          | EQS           | SFW           | /            | 8.17 | 35.10         | 0.7279                   | 1.060                     | 0.8349                     | 5.652                      | 23.96                                   | 1.724                                   | 0.2700                    |
| EQ12          | EQS           | SFW           | /            | 8.33 | 32.90         | 0.5322                   | 0.9416                    | 0.8495                     | 5.793                      | 23.22                                   | 1.887                                   | 0.5080                    |
| EQ13          | EQS           | PGW           | /            | 7.75 | 2060          | 1.002                    | 524.18                    | 61.45                      | 111.0                      | 83.00                                   | 441.6                                   | 774.0                     |
| EQ14          | EQS           | PGW           | /            | 7.83 | 1450          | 0.9165                   | 351.7                     | 40.10                      | 100.2                      | 91.18                                   | 416.1                                   | 498.5                     |
| EQ15          | EQS           | PGW           | /            | 7.79 | 1460          | 0.9073                   | 334.5                     | 39.68                      | 100.8                      | 83.30                                   | 382.3                                   | 458.0                     |
| EQ16          | EQS           | PGW           | /            | 7.18 | 280.0         | 0.6753                   | 59.96                     | 1.378                      | 16.10                      | 149.0                                   | 23.96                                   | 15.05                     |
| EQ17          | EQS           | PGW           | /            | 7.04 | 1570          | 3.121                    | 378.1                     | 50.63                      | 121.8                      | 97.22                                   | 339.8                                   | 600.3                     |
| EQ18          | EQS           | PGW           | /            | 7.42 | 1080          | 1.090                    | 255.7                     | 12.97                      | 61.38                      | 85.62                                   | 352.8                                   | 258.1                     |
| EQ19          | EQS           | PGW           | /            | 8.05 | 2520          | 1.642                    | 631.8                     | 24.24                      | 287.9                      | 17.19                                   | 761.2                                   | 906.6                     |
| EQ20          | EQS           | PGW           | /            | 8.00 | 1720          | 2.429                    | 427.2                     | 37.75                      | 85.74                      | 156.7                                   | 586.1                                   | 356.9                     |
| EQ21          | EQS           | PGW           | /            | 7.27 | 1130          | 4.160                    | 297.1                     | 21.53                      | 86.01                      | 136.7                                   | 216.0                                   | 405.1                     |
| EQ22          | EQS           | PGW           | /            | 7.10 | 440.0         | 1.329                    | 11.22                     | 13.44                      | 85.75                      | 236.5                                   | 44.14                                   | 29.62                     |

|       |             |         |   |      |       |        |        |        |       |       |       |       |
|-------|-------------|---------|---|------|-------|--------|--------|--------|-------|-------|-------|-------|
| EQ23  | EQS         | PG<br>W | / | 7.70 | 645.1 | 1.565  | 18.92  | 15.41  | 134.6 | 292.5 | 83.72 | 66.32 |
| EQ24  | EQS         | PG<br>W | / | 7.30 | 580.3 | 2.325  | 71.25  | 17.19  | 72.54 | 173.5 | 179.9 | 56.33 |
| EQ25  | EQS         | PG<br>W | / | 7.30 | 1468  | 2.077  | 192.0  | 21.40  | 209.0 | 210.4 | 684.0 | 85.70 |
| EQ26  | EQS         | PG<br>W | / | 7.50 | 352.1 | 0.6045 | 7.028  | 8.419  | 72.00 | 196.0 | 69.50 | 5.878 |
| EQ27  | EQS         | PG<br>W | / | 7.60 | 314.5 | 1.137  | 9.612  | 4.105  | 63.68 | 198.4 | 22.29 | 5.215 |
| EQ28  | EQS         | PG<br>W | / | 7.20 | 756.8 | 2.969  | 60.61  | 28.71  | 122.7 | 273.3 | 259.2 | 28.25 |
| EQ29  | EQS         | PG<br>W | / | 7.70 | 944.0 | 2.790  | 56.94  | 30.58  | 152.6 | 298.9 | 361.3 | 31.61 |
| EQ30  | EQS         | PG<br>W | / | 7.10 | 271.2 | 1.641  | 26.22  | 8.632  | 33.21 | 168.6 | 23.00 | 9.700 |
| EQ31  | EQS         | PG<br>W | / | 7.40 | 1113  | 2.221  | 107.19 | 30.94  | 162.3 | 312.8 | 269.0 | 178.3 |
| EQ32  | EQS         | PG<br>W | / | 6.70 | 363.2 | 2.612  | 42.49  | 14.08  | 50.02 | 134.1 | 97.43 | 38.95 |
| EQ33  | EQS         | PG<br>W | / | 7.20 | 2634  | 5.393  | 528.5  | 74.35  | 257.6 | 376.3 | 944.0 | 511.4 |
| EQ34  | EQS         | CG<br>W | / | 7.20 | 2035  | 4.122  | 290.3  | 63.55  | 266.7 | 504.6 | 796.1 | 208.5 |
| EQ35  | EQS         | CG<br>W | / | 8.00 | 563.1 | 2.6079 | 71.69  | 13.04  | 66.11 | 171.6 | 159.4 | 57.36 |
| JG001 | JG-<br>THB  | SFW     | / | 6.59 | 329.6 | 7.613  | 50.32  | 11.05  | 21.23 | 180.4 | 47.57 | 21.07 |
| JG002 | JG-<br>THB  | SFW     | / | 6.66 | 47.49 | 1.679  | 5.708  | 0.9856 | 4.939 | 26.40 | 2.026 | 6.161 |
| JG003 | JG-<br>MNST | SFW     | / | 7.78 | 105.6 | 0.4016 | 4.217  | 6.204  | 14.08 | 58.98 | 13.34 | 3.354 |
| JG004 | JG-<br>MNST | SFW     | / | 7.91 | 90.00 | 2.025  | 3.432  | 2.710  | 17.02 | 32.27 | 29.38 | 6.922 |
| JG005 | JG-<br>MNST | SFW     | / | 7.94 | 112.0 | 2.657  | 5.191  | 2.910  | 20.95 | 47.96 | 30.59 | 7.333 |
| JG006 | JG-<br>MNST | SFW     | / | 8.02 | 110.0 | 2.243  | 5.825  | 2.733  | 17.44 | 45.17 | 30.89 | 3.270 |
| JG007 | JG-<br>MNST | SFW     | / | 7.26 | 200.0 | 3.262  | 10.65  | 5.632  | 31.58 | 114.0 | 19.95 | 14.73 |
| JG008 | JG-<br>MNST | SFW     | / | 8.02 | 200.0 | 1.982  | 9.324  | 3.696  | 38.60 | 105.0 | 38.88 | 7.175 |
| JG009 | JG-<br>MNST | SFW     | / | 8.37 | 280.0 | 1.899  | 15.64  | 11.81  | 42.83 | 120.4 | 54.14 | 19.98 |

|          |       |          |   |      |       |        |        |       |        |       |       |       |
|----------|-------|----------|---|------|-------|--------|--------|-------|--------|-------|-------|-------|
| JG-<br>B | JG010 | MNST SFW | / | 7.51 | 180.0 | 2.218  | 20.87  | 1.379 | 29.56  | 63.78 | 50.20 | 18.53 |
| JG-<br>B | JG011 | MNST SFW | / | 8.22 | 260.0 | 2.037  | 11.97  | 8.862 | 43.84  | 122.6 | 45.96 | 13.57 |
| JG-<br>B | JG012 | MNST SFW | / | 7.35 | 270.0 | 2.216  | 15.63  | 8.264 | 43.15  | 126.3 | 49.72 | 16.31 |
| JG-<br>B | JG013 | MNST SFW | / | 8.00 | 270.0 | 1.623  | 4.173  | 11.16 | 50.12  | 116.7 | 73.77 | 5.168 |
| JG-<br>B | JG014 | MNST SFW | / | 8.24 | 240.8 | 1.317  | 11.13  | 8.696 | 39.72  | 109.9 | 53.77 | 7.750 |
| JG-<br>B | JG015 | MNST SFW | / | 8.05 | 232.9 | 1.105  | 9.340  | 6.490 | 43.71  | 121.0 | 37.68 | 9.737 |
| JG-<br>B | JG016 | MNST SFW | / | 8.30 | 433.0 | 2.6400 | 27.74  | 16.64 | 66.97  | 171.0 | 116.9 | 16.13 |
| JG-<br>B | JG017 | MNST SFW | / | 8.1  | 354.0 | 1.704  | 29.17  | 11.38 | 45.81  | 126.5 | 101.4 | 20.38 |
| JG-<br>B | JG018 | MNST SFW | / | 8.21 | 267.7 | 1.859  | 15.71  | 9.086 | 45.93  | 98.49 | 63.15 | 26.09 |
| JG-<br>B | JG019 | MNST SFW | / | 8.19 | 231.7 | 1.182  | 2.757  | 9.581 | 48.44  | 109.4 | 67.17 | 3.530 |
| JG-<br>B | JG020 | MNST SFW | / | 8.2  | 230.6 | 0.5151 | 0.9565 | 9.473 | 41.66  | 102.8 | 58.03 | 5.765 |
| JG-<br>B | JG021 | MNST SFW | / | 8.15 | 233.4 | 0.6230 | 1.157  | 10.28 | 45.29  | 109.7 | 62.37 | 6.196 |
| JG-<br>B | JG022 | MNST SFW | / | 8.30 | 366.4 | 2.1945 | 23.06  | 16.66 | 57.514 | 154.0 | 113.6 | 16.82 |
| JG-<br>B | JG023 | MNST SFW | / | 8.30 | 556.4 | 7.034  | 18.09  | 28.38 | 93.39  | 239.9 | 167.7 | 28.92 |
| JG-<br>B | JG024 | MNST SFW | / | 8.30 | 362.3 | 1.9749 | 20.47  | 15.63 | 52.87  | 134.8 | 107.1 | 14.72 |
| JG-<br>B | JG025 | MNST SFW | / | 8.00 | 287.0 | 1.712  | 17.99  | 11.93 | 47.60  | 132.1 | 53.41 | 35.08 |
| JG-<br>B | JG026 | MNST SFW | / | 8.00 | 322.8 | 0.7527 | 8.751  | 11.99 | 51.76  | 176.9 | 46.85 | 10.39 |

|       |         |      |   |      |       |        |       |       |       |        |        |       |
|-------|---------|------|---|------|-------|--------|-------|-------|-------|--------|--------|-------|
| JG027 | JG-MNST | SFW  | / | 8.50 | 366.0 | 9.076  | 23.34 | 12.15 | 64.10 | 132.9  | 87.16  | 47.77 |
| JG028 | JG-MNST | SFW  | / | 8.00 | 269.0 | 1.402  | 2.604 | 9.620 | 59.97 | 124.1  | 77.27  | 3.489 |
| JG029 | JG-MNST | SFW  | / | 9.00 | 325.0 | 2.363  | 31.39 | 10.88 | 52.58 | 73.95  | 95.79  | 53.01 |
| JG030 | JG-MNST | SFW  | / | 8.00 | 349.5 | 2.325  | 24.43 | 16.92 | 47.93 | 122.1  | 124.1  | 5.624 |
| JG031 | JG-ABB  | SFW  | / | 7.40 | 192.4 | 5.418  | 3.546 | 24.96 | 7.270 | 111.6  | 27.36  | 6.577 |
| JG032 | JG-ABB  | SFW  | / | 8.76 | 1850  | 27.54  | 268.8 | 193.4 | 16.73 | 262.3  | 913.5  | 252.5 |
| JG033 | JG-ABB  | SFW  | / | 8.74 | 1840  | 22.68  | 237.1 | 191.7 | 27.50 | 260.7  | 876.9  | 240.4 |
| JG034 | JG-ABB  | SFW  | / | 8.73 | 1840  | 24.19  | 263.7 | 215.3 | 20.31 | 258.5  | 873.9  | 243.7 |
| JG035 | JG-ABB  | SFW  | / | 7.96 | 253.0 | 0.9231 | 3.363 | 17.38 | 43.09 | 103.9  | 84.81  | 3.524 |
| JG036 | JG-ABB  | SFW  | / | 7.77 | 253.0 | 1.766  | 16.89 | 8.927 | 43.18 | 96.95  | 70.21  | 15.89 |
| JG037 | JG-EMB  | SFW  | / | 9.81 | 6200  | 56.64  | 1691  | 136.0 | 22.50 | 1515   | 2106   | 514.5 |
| JG038 | JG-EMB  | SFW  | / | 7.60 | 201.0 | 0.9711 | 15.57 | 6.572 | 27.65 | 70.42  | 61.55  | 9.425 |
| JG039 | JG-EMB  | SFW  | / | 7.30 | 331.0 | 3.951  | 34.23 | 22.27 | 18.38 | 208.3  | 12.549 | 26.19 |
| JG040 | JG-WLGB | SFW  | / | 7.87 | 321.0 | 3.133  | 32.68 | 11.34 | 51.42 | 60.76  | 141.7  | 28.74 |
| JG041 | JG-WLGB | SFW  | / | 7.66 | 1260  | 24.29  | 275.8 | 27.37 | 59.30 | 296.3  | 389.1  | 204.1 |
| JG042 | JG-WLGB | SFW  | / | 8.02 | 2190  | 49.92  | 525.5 | 71.31 | 30.23 | 494.4  | 534.5  | 381.3 |
| JG043 | JG-WLGB | SFW  | / | 8.09 | 2940  | 67.61  | 662.6 | 85.26 | 43.27 | 774.5  | 749.6  | 473.6 |
| JG044 | JG-WLGB | SFW  | / | 8.48 | 2040  | 53.19  | 497.3 | 68.73 | 34.38 | 211.1  | 633.0  | 467.8 |
| JG045 | JG-THB  | PG W | / | 7.16 | 1253  | 7.374  | 239.5 | 43.13 | 126.9 | 35.25  | 253.0  | 485.5 |
| JG046 | JG-THB  | PG W | / | 7.42 | 1471  | 3.236  | 282.3 | 37.51 | 114.5 | 396.3  | 467.4  | 202.3 |
| JG047 | JG-MNST | PG W | / | 7.76 | 284.2 | 0.7963 | 5.894 | 35.63 | 20.16 | 141.46 | 68.97  | 8.977 |
| JG048 | JG-THB  | PG W | / | /    | 11820 | 43.23  | 3259  | 132.9 | 546.8 | 279.0  | 4973   | 2902  |
| JG049 | JG-THB  | PG W | / | /    | 69610 | 343.0  | 22084 | 561.0 | 3529  | 182.0  | 11343  | 32498 |

|       |           |      |      |      |       |        |       |        |       |        |       |       |
|-------|-----------|------|------|------|-------|--------|-------|--------|-------|--------|-------|-------|
| JG050 | JG-THB    | PG W | /    | /    | 34030 | 852.8  | 10858 | 524.1  | 689.9 | 463.7  | 1261  | 19498 |
| JG051 | JG-THB    | PG W | /    | /    | 34690 | 91.81  | 11463 | 125.1  | 826.5 | 110.2  | 11307 | 12156 |
| JG052 | JG-MNST B | PG W | 25.0 | 8.67 | 9095  | 5.132  | 3710  | 44.02  | 6.718 | 6.236  | 145.2 | 5613  |
| JG053 | JG-MNST B | PG W | 23.9 | 8.93 | 9445  | 5.749  | 3804  | 48.61  | 6.344 | 6.854  | 146.2 | 5895  |
| JG054 | JG-MNST B | PG W | 36.0 | 9.16 | 351.5 | 1.786  | 117.1 | 0.1366 | 3.094 | 10.52  | 136.5 | 74.12 |
| JG055 | JG-MNST B | PG W | 49.5 | 9.70 | 335.2 | 0.8739 | 114.7 | 0.0480 | 3.985 | 0.2116 | 135.4 | 84.43 |
| JG056 | JG-MNST B | PG W | 42.5 | 9.30 | 716.7 | 3.611  | 193.0 | 3.895  | 31.05 | 0.2511 | 347.1 | 128.6 |
| JG057 | JG-MNST B | PG W | 22.4 | 8.10 | 11768 | 10.33  | 4456  | 105.6  | 13.47 | 6.881  | 40.77 | 7212  |
| JG058 | JG-MNST B | PG W | 30.8 | 8.42 | 13070 | 14.88  | 5032  | 94.94  | 22.34 | 8.714  | 45.25 | 8431  |
| JG059 | JG-MNST B | PG W | 24.9 | 8.07 | 14179 | 14.82  | 5580  | 145.5  | 68.14 | 1.823  | 56.18 | 8677  |
| JG060 | JG-MNST B | PG W | 22.2 | 7.86 | 14985 | 9.749  | 5337  | 148.7  | 62.52 | 1.770  | 58.50 | 9031  |
| JG061 | JG-ABB    | PG W | /    | 7.51 | 160.3 | 0.5949 | 6.901 | 5.503  | 30.15 | 42.88  | 34.51 | 31.82 |
| JG062 | JG-ABB    | PG W | 43.3 | 9.36 | 380.7 | 2.580  | 126.2 | 0.1445 | 11.18 | 1.692  | 191.0 | 66.6  |
| JG063 | JG-ABB    | PG W | 41.9 | 9.48 | 385.7 | 2.350  | 115.6 | 0.1261 | 9.789 | 0.1997 | 180.8 | 62.80 |
| JG064 | JG-EMB    | PG W | 16.5 | 8.31 | 3747  | 10.65  | 1351  | 44.69  | 26.64 | 3.907  | 163.0 | 2084  |
| JG065 | JG-EMB    | PG W | 20.5 | 8.86 | 3773  | 11.59  | 1387  | 46.03  | 27.53 | 6.87   | 171.6 | 2172  |
| JG066 | JG-MNST B | PG W | 11.5 | 8.00 | 264.9 | 0.7116 | 45.09 | 3.654  | 24.61 | 170.9  | 13.31 | 9.261 |
| JG067 | JG-MNST B | PG W | 12.2 | 6.15 | 817.9 | 3.962  | 69.17 | 20.05  | 140.2 | 99.73  | 349.2 | 99.49 |
| JG068 | JG-MNST B | PG W | 12   | 8.95 | 276.5 | 0.3125 | 75.88 | 2.057  | 7.278 | 155.0  | 36.04 | 13.80 |

|       |              |         |      |      |            |        |       |        |       |       |       |       |
|-------|--------------|---------|------|------|------------|--------|-------|--------|-------|-------|-------|-------|
| JG069 | JG-MNST<br>B | PG<br>W | 13.3 | 8.84 | 293.8      | 0.3326 | 78.77 | 0.7246 | 7.591 | 158.3 | 44.24 | 15.72 |
| JG070 | JG-MNST<br>B | PG<br>W | 11.3 | 8.50 | 1217       | 1.891  | 298.6 | 26.92  | 40.14 | 483.8 | 292.9 | 133.3 |
| JG071 | JG-MNST<br>B | PG<br>W | /    | /    | 455.7      | 2.383  | 23.67 | 17.78  | 66.60 | 238.8 | 74.25 | 15.29 |
| JG072 | JG-MNST<br>B | PG<br>W | /    | 7.93 | 210.0      | 0.8369 | 34.45 | 2.601  | 21.45 | 122.7 | 13.80 | 13.58 |
| JG073 | JG-MNST<br>B | PG<br>W | /    | 8.12 | 340.0      | 1.305  | 53.70 | 12.17  | 26.75 | 100.1 | 136.9 | 9.185 |
| JG074 | JG-MNST<br>B | PG<br>W | /    | 8.27 | 820.0      | 2.088  | 22.10 | 88.28  | 85.63 | 190.4 | 439.8 | 25.83 |
| JG075 | JG-MNST<br>B | PG<br>W | /    | 8.03 | 330.0      | 0.8029 | 80.26 | 6.239  | 18.52 | 118.5 | 51.84 | 68.88 |
| JG076 | JG-MNST<br>B | PG<br>W | /    | 8.13 | 1360       | 1.075  | 261.1 | 42.30  | 106.5 | 116.5 | 467.7 | 297.8 |
| JG077 | JG-MNST<br>B | PG<br>W | /    | 7.51 | 270.0      | 1.509  | 59.87 | 2.344  | 13.53 | 138.0 | 5.431 | 36.08 |
| JG078 | JG-MNST<br>B | PG<br>W | /    | 7.7  | 2330       | 2.799  | 316.8 | 87.01  | 286.9 | 232.8 | 926.5 | 496.0 |
| JG079 | JG-MNST<br>B | PG<br>W | /    | 8.53 | 910.0      | 0.8615 | 243.1 | 2.678  | 13.25 | 608.7 | 41.31 | 42.69 |
| JG080 | JG-MNST<br>B | PG<br>W | /    | 7.85 | 2520       | 1.263  | 821.6 | 34.01  | 58.24 | 358.8 | 421.2 | 896.1 |
| JG081 | JG-THB       | PG<br>W | /    | /    | 1442<br>30 | 312.6  | 49638 | 1960   | 1332  | 135.9 | 10821 | 72969 |
| JG082 | JG-THB       | PG<br>W | /    | /    | 7610       | 33.89  | 2126  | 82.13  | 298.5 | 269.4 | 1884  | 2723  |
| JG083 | JG-THB       | PG<br>W | /    | /    | 6860       | 26.97  | 1955  | 100.7  | 392.5 | 146.0 | 2914  | 1645  |
| JG084 | JG-THB       | PG<br>W | /    | /    | 1427<br>0  | 54.54  | 4142  | 161.1  | 666.7 | 65.33 | 5878  | 3860  |
| JG085 | JG-THB       | PG<br>W | /    | /    | 8760       | 38.24  | 2533  | 64.22  | 403.5 | 139.6 | 3372  | 2509  |
| JG086 | JG-THB       | PG<br>W | /    | /    | 6696<br>0  | 284.2  | 22801 | 637.8  | 776.8 | 151.7 | 15028 | 29305 |
| JG087 | JG-THB       | PG<br>W | /    | /    | 2876<br>0  | 79.39  | 8983  | 120.7  | 624.7 | 88.82 | 7800  | 10044 |

|       |            |         |   |      |       |        |       |       |       |       |       |       |
|-------|------------|---------|---|------|-------|--------|-------|-------|-------|-------|-------|-------|
| JG088 | JG-<br>EMB | PG<br>W | / | 7.74 | 231.0 | 0.7680 | 13.27 | 11.26 | 29.70 | 117.1 | 41.97 | 11.53 |
| JG089 | JG-<br>EMB | PG<br>W | / | 7.7  | 178.3 | 1.229  | 10.39 | 6.321 | 28.29 | 96.66 | 29.26 | 10.80 |
| JG090 | JG-<br>EMB | PG<br>W | / | 7.6  | 239.7 | 1.431  | 15.03 | 7.338 | 39.71 | 123.8 | 48.75 | 13.11 |
| JG091 | JG-<br>THB | CG<br>W | / | 7.74 | 1081  | 3.126  | 179.5 | 27.85 | 97.35 | 233.9 | 434.9 | 75.68 |
| JG092 | JG-<br>THB | CG<br>W | / | 7.82 | 1002  | 3.350  | 175.9 | 29.67 | 86.56 | 255.3 | 371.7 | 115.6 |
| JG093 | JG-<br>THB | CG<br>W | / | 7.54 | 1081  | 2.385  | 194.2 | 26.70 | 107.2 | 274.7 | 423.7 | 101.3 |
| JG094 | JG-<br>THB | CG<br>W | / | 7.49 | 1068  | 2.707  | 181.6 | 26.28 | 108.5 | 277.4 | 428.2 | 88.97 |
| JG095 | JG-<br>THB | CG<br>W | / | 7.80 | 1209  | 3.660  | 213.6 | 43.86 | 87.55 | 243.5 | 478.9 | 128.0 |
| JG096 | JG-<br>THB | CG<br>W | / | 7.53 | 1892  | 3.306  | 370.2 | 31.80 | 141.4 | 341.1 | 776.6 | 148.1 |
| JG097 | JG-<br>THB | CG<br>W | / | 7.37 | 3295  | 10.20  | 555.5 | 99.10 | 298.6 | 364.5 | 1522  | 335.9 |
| JG098 | JG-<br>THB | CG<br>W | / | 7.74 | 1000  | 1.328  | 250.3 | 12.18 | 43.53 | 170.8 | 408.0 | 91.79 |
| JG099 | JG-<br>THB | CG<br>W | / | 7.72 | 1104  | 2.463  | 251.6 | 18.56 | 72.68 | 175.9 | 519.2 | 113.0 |
| JG100 | JG-<br>THB | CG<br>W | / | 7.53 | 6488  | 4.243  | 1790  | 87.68 | 293.2 | 179.0 | 2028  | 1791  |
| JG101 | JG-<br>THB | CG<br>W | / | 7.92 | 1783  | 4.969  | 392.5 | 36.48 | 144.3 | 122.7 | 680.2 | 394.4 |
| JG102 | JG-<br>THB | CG<br>W | / | 8.15 | 2245  | 5.149  | 531.9 | 42.41 | 182.2 | 103.2 | 902.3 | 574.0 |
| JG103 | JG-<br>THB | CG<br>W | / | 7.81 | 2120  | 5.609  | 489.7 | 50.35 | 196.6 | 104.9 | 873.6 | 504.4 |
| JG104 | JG-<br>THB | CG<br>W | / | 7.81 | 1669  | 4.762  | 342.5 | 54.34 | 167.6 | 124.8 | 609.4 | 429.4 |
| JG105 | JG-<br>THB | CG<br>W | / | 7.78 | 2093  | 5.943  | 444.1 | 54.06 | 178.3 | 108.7 | 839.4 | 538.6 |
| JG106 | JG-<br>THB | CG<br>W | / | 7.55 | 3177  | 12.85  | 696.0 | 64.41 | 253.3 | 215.9 | 1124  | 687.9 |
| JG107 | JG-<br>THB | CG<br>W | / | 7.86 | 1688  | 5.037  | 397.9 | 25.44 | 111.0 | 141.6 | 590.5 | 334.5 |
| JG108 | JG-<br>THB | CG<br>W | / | 7.84 | 1066  | 3.295  | 179.5 | 28.60 | 132.8 | 189.4 | 475.3 | 110.2 |
| JG109 | JG-<br>THB | CG<br>W | / | 7.67 | 1145  | 2.615  | 243.9 | 2.843 | 123.0 | 136.3 | 499.1 | 127.6 |
| JG110 | JG-<br>THB | CG<br>W | / | 8.12 | 1774  | 3.281  | 417.2 | 41.64 | 121.6 | 134.1 | 715.6 | 394.1 |
| JG111 | JG-<br>THB | CG<br>W | / | 8.15 | 2024  | 5.630  | 554.5 | 31.20 | 104.9 | 117.1 | 732.9 | 520.0 |
| JG112 | JG-<br>THB | CG<br>W | / | 8.20 | 1136  | 2.677  | 172.0 | 28.63 | 110.3 | 206.8 | 479.4 | 99.15 |

|       |           |      |   |      |       |        |       |       |       |       |       |       |
|-------|-----------|------|---|------|-------|--------|-------|-------|-------|-------|-------|-------|
| JG113 | JG-THB    | CG W | / | /    | 9260  | 47.89  | 2418  | 88.75 | 628.4 | 66.48 | 2966  | 2962  |
| JG114 | JG-THB    | CG W | / | /    | 10550 | 33.97  | 3403  | 58.17 | 278.5 | 1689  | 2245  | 3048  |
| JG115 | JG-THB    | CG W | / | /    | 19080 | 39.93  | 5666  | 101.1 | 548.8 | 96.82 | 6325  | 5597  |
| JG116 | JG-MNST B | CG W | / | 7.90 | 400.0 | 2.196  | 23.08 | 10.79 | 76.59 | 152.5 | 113.6 | 40.95 |
| JG117 | JG-MNST B | CG W | / | 8.00 | 839.7 | 2.478  | 75.94 | 19.94 | 146.1 | 204.1 | 302.1 | 116.0 |
| JG118 | JG-MNST B | CG W | / | 7.80 | 280.0 | 1.290  | 13.21 | 6.161 | 49.36 | 140.1 | 48.22 | 12.70 |
| JG119 | JG-MNST B | CG W | / | 7.70 | 416.4 | 1.648  | 28.20 | 11.95 | 72.25 | 168.3 | 112.4 | 35.12 |
| JG120 | JG-MNST B | CG W | / | 8.00 | 350.0 | 2.237  | 45.36 | 8.132 | 38.87 | 171.7 | 67.60 | 22.19 |
| JG121 | JG-MNST B | CG W | / | 7.90 | 342.0 | 2.338  | 47.74 | 5.130 | 31.37 | 169.4 | 55.70 | 13.88 |
| JG122 | JG-MNST B | CG W | / | 7.90 | 470.0 | 1.625  | 74.65 | 8.192 | 46.67 | 172.9 | 98.30 | 44.63 |
| JG123 | JG-MNST B | CG W | / | 7.80 | 582.9 | 1.903  | 87.46 | 15.93 | 59.12 | 245.4 | 136.5 | 51.36 |
| JG124 | JG-MNST B | CG W | / | 7.70 | 700.0 | 1.896  | 87.13 | 14.62 | 86.93 | 200.0 | 233.0 | 60.33 |
| JG125 | JG-MNST B | CG W | / | 7.60 | 764.0 | 2.184  | 105.4 | 13.89 | 110.8 | 192.5 | 279.7 | 75.28 |
| JG126 | JG-MNST B | CG W | / | 7.80 | 288.2 | 1.231  | 10.40 | 10.57 | 52.27 | 103.4 | 79.05 | 25.74 |
| JG127 | JG-MNST B | CG W | / | 8.00 | 246.4 | 0.6604 | 7.679 | 7.704 | 45.36 | 95.82 | 53.89 | 25.07 |
| JG128 | JG-MNST B | CG W | / | 7.60 | 619.2 | 2.533  | 81.91 | 22.03 | 58.42 | 210.9 | 165.2 | 65.03 |
| JG129 | JG-MNST B | CG W | / | 7.70 | 607.4 | 2.547  | 82.36 | 22.79 | 63.73 | 185.7 | 156.8 | 69.54 |
| JG130 | JG-MNST B | CG W | / | 8.00 | 401.1 | 2.066  | 40.26 | 8.821 | 57.88 | 205.5 | 59.53 | 19.55 |

|       |              |         |      |      |            |        |       |       |       |       |       |       |
|-------|--------------|---------|------|------|------------|--------|-------|-------|-------|-------|-------|-------|
| JG131 | JG-MNST<br>B | CG<br>W | /    | 8.10 | 339.3      | 2.392  | 38.92 | 6.482 | 52.39 | 114.7 | 90.84 | 36.02 |
| JG132 | JG-MNST<br>B | CG<br>W | /    | 8.50 | 404.0      | 2.293  | 39.25 | 15.13 | 51.14 | 111.5 | 124.2 | 40.49 |
| JG133 | JG-MNST<br>B | CG<br>W | /    | 8.10 | 230.0      | 1.460  | 15.13 | 5.407 | 41.04 | 112.8 | 50.76 | 13.26 |
| JG134 | JG-MNST<br>B | CG<br>W | /    | 8.60 | 160.0      | 1.272  | 20.33 | 3.818 | 20.56 | 70.59 | 42.53 | 8.859 |
| JG135 | JG-MNST<br>B | CG<br>W | /    | 8.00 | 190.0      | 1.541  | 13.87 | 4.352 | 34.06 | 103.2 | 27.44 | 12.63 |
| JG136 | JG-MNST<br>B | CG<br>W | /    | 8.30 | 368.0      | 1.719  | 27.47 | 22.98 | 40.09 | 199.9 | 71.94 | 21.06 |
| JG137 | JG-MNST<br>B | CG<br>W | /    | 8.00 | 350.0      | 1.931  | 33.06 | 9.785 | 60.52 | 118.3 | 98.46 | 45.21 |
| JG138 | JG-MNST<br>B | CG<br>W | 13.6 | 7.95 | 300.6      | 2.068  | 33.43 | 7.942 | 43.16 | 144.7 | 62.52 | 20.80 |
| JG139 | JG-MNST<br>B | CG<br>W | 10.3 | 7.81 | 522.2      | 2.779  | 37.81 | 16.90 | 87.66 | 148.7 | 141.4 | 61.14 |
| JG140 | JG-MNST<br>B | CG<br>W | 16.7 | 7.85 | 272.1      | 2.955  | 17.58 | 6.956 | 50.43 | 151.9 | 41.19 | 13.89 |
| JG141 | JG-MNST<br>B | CG<br>W | 15.6 | 7.65 | 460.9      | 2.286  | 17.44 | 13.43 | 85.07 | 183.6 | 99.62 | 44.21 |
| JG142 | JG-MNST<br>B | CG<br>W | 11.5 | 7.65 | 282.6      | 1.378  | 34.67 | 5.091 | 32.76 | 182.7 | 21.49 | 11.90 |
| JG143 | JG-MNST<br>B | CG<br>W | /    | /    | 191.3      | 2.433  | 21.88 | 4.371 | 21.73 | 103.3 | 16.88 | 13.54 |
| JG144 | JG-MNST<br>B | CG<br>W | /    | 7.70 | 388.1      | 1.984  | 31.69 | 15.16 | 44.93 | 187.4 | 68.52 | 22.71 |
| JG145 | JG-MNST<br>B | CG<br>W | /    | 8.10 | 190.0<br>0 | 0.8440 | 9.707 | 6.268 | 34.45 | 100.5 | 32.07 | 9.846 |
| JG146 | JG-MNST<br>B | CG<br>W | /    | 8.10 | 213.9      | 1.631  | 27.91 | 4.851 | 25.26 | 78.71 | 48.83 | 17.22 |
| JG147 | JG-MNST<br>B | CG<br>W | /    | 7.90 | 310.0      | 1.945  | 20.43 | 10.50 | 48.48 | 135.5 | 71.48 | 20.39 |

|       |              |         |   |      |       |        |        |        |       |       |       |       |
|-------|--------------|---------|---|------|-------|--------|--------|--------|-------|-------|-------|-------|
| JG148 | JG-MNST<br>B | CG<br>W | / | 7.60 | 155.6 | 1.252  | 20.01  | 3.091  | 16.69 | 81.98 | 17.60 | 7.220 |
| JG149 | JG-MNST<br>B | CG<br>W | / | 8.00 | 280.0 | 1.795  | 30.72  | 9.074  | 41.17 | 115.6 | 71.64 | 22.23 |
| JG150 | JG-MNST<br>B | CG<br>W | / | 8.00 | 181.8 | 1.567  | 26.82  | 2.672  | 21.42 | 85.96 | 31.67 | 11.16 |
| JG151 | JG-MNST<br>B | CG<br>W | / | 7.80 | 900.0 | 2.241  | 108.1  | 35.73  | 110.5 | 200.1 | 307.7 | 134.9 |
| JG152 | JG-MNST<br>B | CG<br>W | / | 8.80 | 219.2 | 2.853  | 58.24  | 0.3965 | 3.245 | 87.94 | 44.13 | 20.44 |
| JG153 | JG-MNST<br>B | CG<br>W | / | 8.20 | 576.2 | 1.598  | 175.9  | 11.52  | 16.56 | 10.67 | 82.04 | 252.4 |
| JG154 | JG-MNST<br>B | CG<br>W | / | 8.20 | 339.3 | 2.431  | 39.55  | 18.47  | 28.85 | 140.6 | 75.11 | 32.09 |
| JG155 | JG-MNST<br>B | CG<br>W | / | 8.30 | 394.4 | 3.279  | 52.38  | 12.16  | 36.78 | 159.0 | 81.89 | 40.61 |
| JG156 | JG-MNST<br>B | CG<br>W | / | 8.10 | 782.9 | 1.633  | 75.03  | 40.42  | 75.33 | 339.2 | 155.2 | 57.81 |
| JG157 | JG-MNST<br>B | CG<br>W | / | 7.40 | 539.1 | 2.480  | 49.73  | 11.89  | 88.22 | 268.6 | 99.54 | 30.33 |
| JG158 | JG-ABB       | CG<br>W | / | 7.59 | 396.0 | 1.953  | 32.59  | 20.34  | 45.82 | 118.8 | 120.1 | 37.98 |
| JG159 | JG-ABB       | CG<br>W | / | 7.77 | 289.0 | 1.565  | 17.04  | 18.14  | 34.76 | 103.9 | 81.18 | 28.56 |
| JG160 | JG-ABB       | CG<br>W | / | 7.40 | 289.4 | 1.436  | 4.573  | 15.55  | 44.09 | 153.8 | 50.45 | 8.437 |
| JG161 | JG-ABB       | CG<br>W | / | 8.00 | 280.3 | 0.5477 | 6.315  | 5.613  | 59.69 | 157.2 | 48.41 | 11.52 |
| JG162 | JG-ABB       | CG<br>W | / | 7.80 | 309.1 | 1.539  | 26.20  | 6.105  | 53.70 | 87.37 | 84.06 | 34.97 |
| JG163 | JG-ABB       | CG<br>W | / | 8.00 | 559.5 | 2.686  | 73.84  | 2.242  | 80.28 | 100.2 | 203.1 | 69.73 |
| JG164 | JG-ABB       | CG<br>W | / | 8.00 | 213.7 | 1.138  | 9.597  | 13.72  | 30.47 | 133.6 | 24.75 | 9.132 |
| JG165 | JG-ABB       | CG<br>W | / | 7.90 | 547.2 | 1.710  | 27.32  | 32.75  | 73.95 | 282.4 | 109.8 | 29.11 |
| JG166 | JG-ABB       | CG<br>W | / | 8.00 | 214.8 | 1.592  | 16.731 | 3.947  | 34.88 | 104.4 | 31.64 | 12.43 |
| JG167 | JG-ABB       | CG<br>W | / | 8.00 | 208.1 | 1.820  | 19.12  | 5.899  | 32.41 | 98.58 | 30.53 | 22.70 |

|       |            |         |                      |      |                       |        |        |       |       |        |       |       |
|-------|------------|---------|----------------------|------|-----------------------|--------|--------|-------|-------|--------|-------|-------|
| JG168 | JG-<br>ABB | CG<br>W | /                    | 8.40 | 582.5                 | 2.335  | 154.4  | 8.711 | 16.47 | 127.3  | 221.1 | 69.25 |
| JG169 | JG-<br>ABB | CG<br>W | /                    | 8.50 | 249.0                 | 2.399  | 65.95  | 2.137 | 6.733 | 110.5  | 53.39 | 17.76 |
| JG170 | JG-<br>ABB | CG<br>W | /                    | 8.60 | 143.1                 | 2.153  | 35.04  | 1.264 | 4.170 | 81.36  | 19.76 | 5.679 |
| JG171 | JG-<br>ABB | CG<br>W | /                    | 8.40 | 367.2                 | 2.627  | 94.67  | 6.792 | 18.07 | 99.02  | 85.61 | 73.24 |
| JG172 | JG-<br>ABB | CG<br>W | /                    | 8.00 | 1450                  | 4.018  | 361.3  | 30.87 | 79.75 | 156.1  | 577.0 | 312.9 |
| JG173 | JG-<br>ABB | CG<br>W | /                    | 8.60 | 187.2                 | 0.7488 | 49.50  | 2.649 | 4.058 | 90.51  | 31.39 | 16.88 |
| JG174 | JG-<br>ABB | CG<br>W | /                    | 8.00 | 1051                  | 2.499  | 231.0  | 36.26 | 65.46 | 181.9  | 394.7 | 163.9 |
| JG175 | JG-<br>ABB | CG<br>W | /                    | 8.40 | 1341                  | 5.024  | 332.1  | 26.74 | 45.85 | 175.0  | 500.9 | 188.2 |
| JG176 | JG-<br>ABB | CG<br>W | /                    | 8.50 | 187.1                 | 2.448  | 47.72  | 1.554 | 7.042 | 90.90  | 31.18 | 15.58 |
| JG177 | JG-<br>EMB | CG<br>W | /                    | 7.70 | <sup>1607.</sup><br>7 | 3.721  | 262.0  | 102.8 | 71.65 | 568.7  | 529.7 | 134.9 |
| JG178 | JG-<br>EMB | CG<br>W | /                    | 8.00 | 325.2                 | 0.9357 | 14.95  | 7.090 | 68.72 | 92.91  | 86.28 | 40.26 |
| JG179 | JG-<br>EMB | CG<br>W | /                    | 8.10 | 127.5                 | 0.1163 | 0.0914 | 3.448 | 27.86 | 68.86  | 10.33 | 11.89 |
| JG180 | JG-<br>EMB | CG<br>W | /                    | 7.90 | 465.4                 | 2.590  | 51.93  | 21.10 | 55.86 | 224.8  | 115.2 | 16.89 |
| JG181 | JG-<br>EMB | CG<br>W | /                    | 7.60 | 652.0                 | 2.784  | 76.53  | 21.20 | 81.07 | 238.1  | 200.7 | 23.84 |
| JG182 | JG-<br>EMB | CG<br>W | /                    | 7.90 | 331.7                 | 2.186  | 36.85  | 11.16 | 31.50 | 162.58 | 52.58 | 20.42 |
| JG183 | JG-<br>EMB | CG<br>W | /                    | 7.80 | 367.8                 | 2.193  | 42.74  | 11.42 | 39.46 | 178.6  | 63.02 | 22.34 |
| JG184 | JG-<br>EMB | CG<br>W | /                    | 8.00 | 750.6                 | 2.612  | 126.1  | 26.60 | 55.84 | 227.3  | 247.8 | 40.69 |
| JG185 | JG-<br>EMB | CG<br>W | /                    | 7.80 | 527.5                 | 2.674  | 69.60  | 20.85 | 63.69 | 180.3  | 179.2 | 37.16 |
| JG186 | JG-<br>EMB | CG<br>W | /                    | 8.10 | 454.2                 | 2.299  | 46.62  | 10.56 | 59.69 | 166.8  | 128.9 | 27.19 |
| YL001 | YL-<br>GNS | SFW     | /                    | 8.58 | 113.7                 | 1.290  | 4.341  | 2.514 | 24.28 | 47.14  | 35.95 | 2.916 |
| YL002 | YL-<br>GNS | SFW     | 12.0                 | 7.65 | 196.3                 | 0.3266 | 7.077  | 7.948 | 34.95 | 95.92  | 53.92 | 4.830 |
| YL003 | YL-<br>GNS | SFW     | 10.2                 | 7.81 | 183.7                 | 0.325  | 6.716  | 1.625 | 39.11 | 90.44  | 36.64 | 1.483 |
| YL004 | YL-<br>GNS | SFW     | 15.6                 | 7.98 | 1020                  | 4.610  | 141.3  | 44.77 | 90.35 | 266.3  | 323.9 | 126.5 |
| YL005 | YL-<br>GNS | SFW     | /                    | 7.27 | 266.1                 | 1.797  | 18.33  | 11.17 | 36.34 | 123.2  | 58.53 | 15.92 |
| YL006 | YL-<br>GNS | SFW     | <sup>16.1</sup><br>0 | 8.08 | 300.9                 | 1.614  | 19.17  | 9.784 | 44.48 | 144.4  | 59.27 | 16.77 |

|       |        |     |           |      |       |        |       |        |        |       |        |        |
|-------|--------|-----|-----------|------|-------|--------|-------|--------|--------|-------|--------|--------|
| YL007 | YL-GNS | SFW | 15.9<br>0 | 8.33 | 292.4 | 1.316  | 12.55 | 9.818  | 48.68  | 167.6 | 48.42  | 8.929  |
| YL008 | YL-GNS | SFW | /         | 7.27 | 984.2 | 2.704  | 161.8 | 42.41  | 80.98  | 144.5 | 346.6  | 179.6  |
| YL009 | YL-GNS | SFW | /         | 7.35 | 95.00 | 0.7170 | 2.165 | 2.358  | 18.48  | 40.07 | 24.31  | 4.248  |
| YL010 | YL-GNS | SFW | /         | 7.85 | 147.0 | 0.9254 | 3.276 | 6.448  | 27.15  | 80.85 | 28.88  | 5.010  |
| YL011 | YL-TKS | SFW | /         | 8.12 | 101.8 | 2.053  | 2.408 | 2.608  | 20.97  | 54.94 | 22.97  | 0.7087 |
| YL012 | YL-TKS | SFW | /         | 7.84 | 112.7 | 1.278  | 2.206 | 3.157  | 21.25  | 57.43 | 26.69  | 0.8179 |
| YL013 | YL-TKS | SFW | /         | 7.57 | 99.31 | 0.8626 | 1.822 | 3.245  | 20.82  | 55.90 | 21.06  | 0.5694 |
| YL014 | YL-TKS | SFW | /         | 8.19 | 108.2 | 1.302  | 2.120 | 3.415  | 21.56  | 54.76 | 23.76  | 1.070  |
| YL015 | YL-TKS | SFW | /         | 7.76 | 131.0 | 1.058  | 3.089 | 4.724  | 22.02  | 58.60 | 33.14  | 2.863  |
| YL016 | YL-TKS | SFW | /         | 7.87 | 122.2 | 1.685  | 3.453 | 3.700  | 23.22  | 60.80 | 25.17  | 2.135  |
| YL017 | YL-TKS | SFW | /         | 7.87 | 141.0 | 1.882  | 4.657 | 7.013  | 26.81  | 47.75 | 55.10  | 4.838  |
| YL018 | YL-TKS | SFW | /         | 7.77 | 106.0 | 1.575  | 3.093 | 2.971  | 21.58  | 57.86 | 20.31  | 1.868  |
| YL019 | YL-TKS | SFW | /         | 7.75 | 130.5 | 1.562  | 3.993 | 4.618  | 24.23  | 63.39 | 33.46  | 3.569  |
| YL020 | YL-TKS | SFW | /         | 8.49 | 130.6 | 1.364  | 4.434 | 4.605  | 23.97  | 61.26 | 33.645 | 4.294  |
| YL021 | YL-TKS | SFW | /         | 7.17 | 198.7 | 1.735  | 7.444 | 7.078  | 34.43  | 89.30 | 48.51  | 7.685  |
| YL022 | YL-TKS | SFW | /         | 7.78 | 91.00 | 0.5630 | 1.667 | 2.293  | 17.30  | 49.21 | 14.30  | 2.266  |
| YL023 | YL-TKS | SFW | /         | 7.83 | 590.0 | 4.258  | 63.77 | 27.19  | 62.84  | 92.61 | 242.8  | 72.76  |
| YL024 | YL-TKS | SFW | /         | 7.75 | 84.00 | 0.8585 | 3.313 | 2.728  | 15.67  | 43.80 | 15.54  | 4.353  |
| YL025 | YL-TKS | SFW | /         | 7.91 | 127.0 | 1.458  | 2.933 | 5.511  | 22.80  | 53.86 | 40.39  | 3.300  |
| YL026 | YL-TKS | SFW | /         | 7.92 | 124.0 | 1.242  | 3.227 | 4.966  | 21.090 | 62.20 | 22.49  | 7.213  |
| YL027 | YL-KS  | SFW | /         | 7.63 | 106.6 | 1.394  | 2.289 | 3.184  | 22.27  | 49.37 | 31.38  | 0.7159 |
| YL028 | YL-KS  | SFW | /         | 7.50 | 151.9 | 1.356  | 6.155 | 4.130  | 27.69  | 72.62 | 35.47  | 6.968  |
| YL029 | YL-KS  | SFW | /         | 7.80 | 58.71 | 0.6479 | 1.805 | 0.9719 | 10.98  | 28.18 | 12.62  | 0.9240 |
| YL030 | YL-KS  | SFW | /         | 8.04 | 156.0 | 1.102  | 2.136 | 5.363  | 29.64  | 95.80 | 21.05  | 2.436  |
| YL031 | YL-KS  | SFW | /         | 7.87 | 88.00 | 1.071  | 1.608 | 2.754  | 16.48  | 42.94 | 20.12  | 1.547  |
| YL032 | YL-KS  | SFW | /         | 8.02 | 680.0 | 4.154  | 126.7 | 30.28  | 53.86  | 110.3 | 286.9  | 90.82  |
| YL033 | YL-KS  | SFW | /         | 8.03 | 113.0 | 1.163  | 4.081 | 3.867  | 19.62  | 49.76 | 26.27  | 3.971  |
| YL034 | YL-KS  | SFW | /         | 7.68 | 134.4 | 1.511  | 6.443 | 3.885  | 23.82  | 61.01 | 28.53  | 5.463  |
| YL035 | YL-KS  | SFW | /         | 7.16 | 158.3 | 1.624  | 7.632 | 4.645  | 28.18  | 84.72 | 32.86  | 6.510  |
| YL036 | YL-YL  | SFW | /         | 8.08 | 202.0 | 1.648  | 7.151 | 6.465  | 34.07  | 106.7 | 37.08  | 6.222  |
| YL037 | YL-YL  | SFW | /         | 8.13 | 141.0 | 1.395  | 4.490 | 3.601  | 30.10  | 76.82 | 25.09  | 5.595  |

|       |                 |      |      |                               |        |       |       |       |       |       |       |
|-------|-----------------|------|------|-------------------------------|--------|-------|-------|-------|-------|-------|-------|
| YL038 | YL-YL SFW       | /    | 7.83 | 197.0                         | 0.4665 | 1.916 | 12.32 | 33.92 | 110.2 | 39.79 | 1.948 |
| YL039 | YL-YL SFW       | /    | 7.72 | 480.0                         | 1.164  | 9.316 | 23.30 | 93.95 | 126.2 | 215.4 | 5.044 |
| YL040 | YL-YL SFW       | /    | 7.26 | 306.5                         | 1.824  | 31.85 | 11.88 | 37.27 | 83.93 | 96.81 | 38.69 |
| YL041 | YL-YL SFW       | /    | 7.25 | 321.4                         | 3.103  | 37.10 | 15.52 | 44.45 | 28.94 | 158.6 | 45.10 |
| YL042 | YL-YL SFW       | /    | 8.41 | 307.2                         | 2.473  | 25.47 | 11.66 | 40.31 | 89.77 | 96.65 | 30.01 |
| YL043 | YL-YL SFW       | /    | 8.32 | 303.6                         | 2.780  | 25.34 | 12.27 | 42.00 | 97.62 | 98.69 | 27.12 |
| YL044 | YL-YL SFW       | /    | 7.29 | 254.0                         | 2.315  | 16.68 | 11.13 | 41.25 | 93.03 | 81.30 | 20.81 |
| YL045 | YL-YL SFW       | /    | 7.85 | 192.0                         | 1.607  | 9.774 | 7.388 | 31.57 | 65.49 | 56.32 | 11.10 |
| YL046 | YL-YL SFW       | /    | 7.94 | 126.0                         | 1.316  | 5.727 | 4.577 | 23.87 | 56.69 | 31.84 | 6.338 |
| YL047 | YL-YL SFW       | 17.4 | 8.13 | 362.4                         | 1.962  | 32.53 | 15.08 | 49.67 | 176.3 | 74.64 | 29.88 |
| YL048 | YL-YL SFW       | 16.3 | 7.92 | 371.9                         | 1.999  | 22.73 | 19.47 | 52.30 | 177.9 | 79.93 | 18.42 |
| YL049 | YL-YL SFW       | 14.8 | 7.46 | 453.4                         | 4.490  | 43.77 | 13.37 | 57.24 | 192.3 | 83.21 | 36.34 |
| YL050 | YL-YL SFW       | 18.6 | 7.69 | 445.5                         | 1.704  | 26.26 | 26.76 | 56.23 | 226.8 | 91.84 | 22.62 |
| YL051 | YL-YL SFW       | 20.9 | 7.32 | 528.6                         | 3.650  | 49.37 | 25.65 | 60.93 | 189.8 | 134.4 | 39.95 |
| YL052 | YL- PG<br>GNS W | 15.0 | 7.06 | 370.8                         | 0.8293 | 12.65 | 10.05 | 66.45 | 196.7 | 48.70 | 24.52 |
| YL053 | YL- PG<br>GNS W | 12.0 | 7.60 | 349.4                         | 0.5680 | 9.996 | 11.02 | 68.27 | 236.7 | 32.85 | 6.502 |
| YL054 | YL- PG<br>GNS W | 14.0 | 7.30 | 493.4                         | 1.717  | 23.93 | 20.82 | 81.77 | 264.0 | 76.50 | 28.23 |
| YL055 | YL- PG<br>GNS W | 16.0 | 7.25 | 425.9                         | 0.8475 | 8.475 | 14.41 | 78.07 | 267.7 | 29.39 | 7.244 |
| YL056 | YL- PG<br>GNS W | 12.0 | 7.69 | 584.9                         | 1.142  | 33.10 | 27.78 | 76.29 | 337.6 | 61.28 | 36.17 |
| YL057 | YL- PG<br>GNS W | 15.2 | 7.30 | 763.6                         | 1.304  | 22.31 | 34.12 | 120.8 | 388.3 | 117.0 | 51.55 |
| YL058 | YL- PG<br>GNS W | 18.9 | 7.82 | 388.7                         | 0.8814 | 9.916 | 16.09 | 70.62 | 191.3 | 91.88 | 5.299 |
| YL059 | YL- PG<br>GNS W | 14.0 | 7.59 | 426.1                         | 0.8269 | 10.44 | 18.60 | 70.39 | 313.7 | 14.97 | 3.911 |
| YL060 | YL- PG<br>GNS W | 14.0 | 7.55 | 669.5                         | 1.385  | 30.90 | 57.00 | 59.77 | 463.8 | 64.39 | 19.79 |
| YL061 | YL- PG<br>GNS W | 15.5 | 7.89 | 768.3                         | 1.453  | 91.02 | 40.37 | 74.83 | 167.7 | 305.9 | 50.41 |
| YL062 | YL- PG<br>GNS W | 14.4 | 7.82 | 506.4                         | 2.191  | 59.58 | 26.92 | 46.01 | 221.8 | 119.1 | 41.69 |
| YL063 | YL- PG<br>GNS W | 13.4 | 7.84 | 581.2                         | 1.291  | 100.6 | 20.87 | 51.74 | 197.9 | 151.5 | 85.83 |
| YL064 | YL- PG<br>GNS W | 13.0 | 8.04 | 772.0                         | 0.8304 | 184.8 | 16.19 | 39.96 | 169.3 | 235.6 | 151.2 |
| YL065 | YL- PG<br>GNS W | 12.8 | 7.77 | <sup>1425.</sup> <sub>4</sub> | 4.371  | 311.8 | 31.13 | 68.33 | 580.3 | 483.6 | 9.510 |
| YL066 | YL- PG<br>GNS W | 16.1 | 7.62 | 501.2                         | 2.258  | 15.35 | 16.48 | 99.57 | 285.8 | 94.23 | 9.479 |
| YL067 | YL- PG<br>GNS W | 18.0 | 7.86 | 320.7                         | 1.940  | 11.07 | 9.469 | 64.00 | 188.2 | 44.97 | 11.27 |
| YL068 | YL- PG<br>GNS W | 15.0 | 7.59 | 923.7                         | 23.16  | 26.89 | 66.07 | 104.9 | 462.8 | 189.6 | 51.54 |
| YL069 | YL- PG<br>GNS W | 13.2 | 7.49 | 1440                          | 25.07  | 109.9 | 95.37 | 183.4 | 377.6 | 574.6 | 117.0 |

|              |        |      |       |      |       |        |       |       |       |       |       |       |
|--------------|--------|------|-------|------|-------|--------|-------|-------|-------|-------|-------|-------|
| <b>YL070</b> | YL-GNS | PG W | 12.6  | 7.56 | 911.1 | 10.78  | 50.32 | 53.99 | 112.3 | 497.9 | 185.2 | 37.51 |
| <b>YL071</b> | YL-GNS | PG W | 16.6  | 7.57 | 1350  | 58.22  | 177.8 | 32.99 | 108.9 | 518.0 | 265.5 | 126.0 |
| <b>YL072</b> | YL-GNS | PG W | 18.3  | 7.75 | 717.2 | 2.888  | 61.74 | 41.13 | 67.81 | 260.6 | 214.9 | 39.66 |
| <b>YL073</b> | YL-GNS | PG W | 13.8  | 7.68 | 960.4 | 3.392  | 173.4 | 27.48 | 81.52 | 405.3 | 267.6 | 45.53 |
| <b>YL074</b> | YL-GNS | PG W | 16.0  | 7.55 | 824.1 | 4.109  | 114.3 | 30.76 | 75.96 | 319.1 | 241.1 | 60.77 |
| <b>YL075</b> | YL-GNS | PG W | 15.5  | 7.44 | 454.0 | 2.331  | 14.51 | 12.93 | 84.97 | 300.7 | 45.06 | 15.02 |
| <b>YL076</b> | YL-YL  | PG W | 13.4  | 7.16 | 1337  | 5.225  | 128.6 | 42.31 | 193.0 | 385.6 | 392.3 | 124.1 |
| <b>YL077</b> | YL-YL  | PG W | 11.4  | 7.17 | 255.7 | 1.867  | 7.799 | 5.382 | 52.83 | 142.5 | 40.21 | 15.74 |
| <b>YL078</b> | YL-YL  | PG W | 15.6  | 7.66 | 720.3 | 1.951  | 18.43 | 50.08 | 95.62 | 524.1 | 52.18 | 13.92 |
| <b>YL079</b> | YL-YL  | PG W | 13.8  | 7.58 | 1532  | 5.070  | 264.1 | 79.54 | 105.8 | 365.0 | 636.0 | 143.8 |
| <b>YL080</b> | YL-YL  | PG W | 12.1  | 7.41 | 843.0 | 4.478  | 34.58 | 45.51 | 121.0 | 381.7 | 193.8 | 25.02 |
| <b>YL081</b> | YL-YL  | PG W | 27.0  | 7.39 | 830.4 | 8.558  | 47.21 | 37.41 | 107.9 | 350.8 | 197.2 | 49.48 |
| <b>YL082</b> | YL-YL  | PG W | 16.7  | 7.53 | 802.9 | 5.898  | 40.78 | 44.44 | 106.0 | 366.5 | 185.4 | 54.70 |
| <b>YL083</b> | YL-YL  | PG W | 14.8  | 7.35 | 1217  | 3.344  | 95.25 | 52.42 | 203.2 | 460.6 | 309.3 | 133.8 |
| <b>YL084</b> | YL-YL  | PG W | 22.3  | 7.18 | 384.8 | 1.521  | 15.11 | 11.86 | 63.36 | 218.7 | 44.58 | 14.97 |
| <b>YL085</b> | YL-YL  | PG W | 15.9  | 7.42 | 1042  | 6.999  | 77.57 | 52.00 | 124.7 | 495.7 | 226.5 | 60.77 |
| <b>YL086</b> | YL-YL  | PG W | 16.5  | 7.46 | 770.1 | 3.788  | 37.16 | 32.35 | 114.9 | 343.6 | 164.2 | 37.10 |
| <b>YL087</b> | YL-YL  | PG W | 15.3  | 7.45 | 1207  | 36.85  | 95.60 | 52.68 | 156.4 | 542.8 | 266.1 | 87.82 |
| <b>YL088</b> | YL-YL  | PG W | 15.2  | 7.55 | 1225  | 8.307  | 110.6 | 73.35 | 150.7 | 451.5 | 397.2 | 92.61 |
| <b>YL089</b> | YL-YL  | PG W | 24.0  | 7.36 | 882.5 | 3.904  | 43.77 | 30.00 | 140.0 | 445.5 | 142.1 | 34.00 |
| <b>YL090</b> | YL-YL  | PG W | 13.7  | 7.76 | 620.7 | 1.505  | 31.41 | 36.53 | 76.47 | 299.8 | 121.9 | 36.23 |
| <b>YL091</b> | YL-YL  | PG W | 13.7  | 7.33 | 1432  | 2.927  | 156.5 | 68.63 | 161.8 | 386.5 | 437.0 | 147.7 |
| <b>YL092</b> | YL-YL  | PG W | 13.1  | 7.50 | 1646  | 13.011 | 205.8 | 98.04 | 99.07 | 431.3 | 537.5 | 180.9 |
| <b>YL093</b> | YL-YL  | PG W | 15.50 | 7.68 | 875.4 | 2.985  | 94.46 | 25.91 | 119.6 | 351.3 | 215.6 | 78.87 |
| <b>YL094</b> | YL-YL  | PG W | /     | 7.80 | 373.2 | 1.757  | 28.08 | 21.97 | 42.98 | 209.3 | 56.25 | 16.35 |

|              |       |         |      |      |       |        |       |       |       |       |       |       |
|--------------|-------|---------|------|------|-------|--------|-------|-------|-------|-------|-------|-------|
| <b>YL095</b> | YL-YL | PG<br>W | /    | 7.60 | 650.0 | 2.204  | 60.59 | 51.85 | 35.13 | 194.9 | 236.7 | 36.21 |
| <b>YL096</b> | YL-YL | PG<br>W | /    | 7.80 | 844.2 | 1.848  | 84.92 | 42.78 | 97.38 | 297.4 | 267.9 | 73.81 |
| <b>YL097</b> | YL-YL | PG<br>W | /    | 7.60 | 512.5 | 0.6371 | 7.407 | 51.69 | 54.10 | 323.3 | 48.07 | 23.65 |
| <b>YL098</b> | YL-YL | PG<br>W | /    | 7.80 | 462.9 | 2.028  | 33.00 | 9.195 | 69.77 | 219.0 | 84.44 | 22.47 |
| <b>YL099</b> | YL-YL | PG<br>W | /    | 6.80 | 119.7 | 0.755  | 1.133 | 4.160 | 22.49 | 73.45 | 17.08 | 1.508 |
| <b>YL100</b> | YL-YL | PG<br>W | 21.1 | 7.90 | 206.2 | 1.114  | 11.85 | 5.369 | 34.14 | 109.9 | 35.91 | 9.333 |
| <b>YL101</b> | YL-YL | PG<br>W | 19.8 | 8.00 | 494.6 | 2.123  | 38.33 | 19.00 | 76.10 | 224.1 | 124.5 | 29.05 |
| <b>YL102</b> | YL-YL | PG<br>W | 25.2 | 7.80 | 644.2 | 2.540  | 25.70 | 29.66 | 101.8 | 338.4 | 144.3 | 14.79 |
| <b>YL103</b> | YL-YL | PG<br>W | 15.5 | 8.10 | 346.7 | 1.496  | 12.18 | 15.60 | 51.39 | 200.3 | 43.39 | 7.283 |
| <b>YL104</b> | YL-YL | PG<br>W | 15.0 | 7.90 | 700.5 | 3.354  | 57.82 | 19.71 | 110.0 | 326.9 | 157.6 | 32.58 |
| <b>YL105</b> | YL-YL | PG<br>W | 14.5 | 7.70 | 538.5 | 2.474  | 20.31 | 25.05 | 82.67 | 304.1 | 94.53 | 15.52 |
| <b>YL106</b> | YL-YL | PG<br>W | 15.9 | 7.80 | 629.5 | 3.063  | 28.65 | 38.43 | 71.23 | 335.1 | 97.75 | 25.22 |
| <b>YL107</b> | YL-YL | PG<br>W | 14.0 | 7.70 | 771.1 | 2.345  | 60.75 | 41.46 | 94.00 | 380.5 | 185.9 | 34.29 |
| <b>YL108</b> | YL-YL | PG<br>W | 18.5 | 7.47 | 476.1 | 2.629  | 44.58 | 28.07 | 42.16 | 271.2 | 52.42 | 20.10 |
| <b>YL109</b> | YL-YL | PG<br>W | 14.0 | 7.80 | 512.3 | 2.273  | 26.14 | 36.17 | 57.97 | 261.9 | 106.1 | 30.18 |
| <b>YL110</b> | YL-YL | PG<br>W | 14.0 | 7.72 | 382.6 | 1.160  | 39.89 | 14.15 | 51.14 | 230.9 | 47.06 | 15.80 |
| <b>YL111</b> | YL-YL | CG<br>W | /    | 8.00 | 347.6 | 1.817  | 19.10 | 17.39 | 59.05 | 128.1 | 67.99 | 52.45 |
| <b>YL112</b> | YL-YL | CG<br>W | /    | 8.10 | 169.5 | 1.008  | 8.518 | 4.373 | 26.71 | 99.03 | 15.77 | 5.699 |
| <b>YL113</b> | YL-YL | CG<br>W | /    | 7.40 | 945.7 | 2.660  | 73.13 | 56.24 | 127.3 | 350.8 | 264.9 | 94.52 |
| <b>YL114</b> | YL-YL | CG<br>W | /    | 7.30 | 950.5 | 1.943  | 93.79 | 40.87 | 112.3 | 401.1 | 241.1 | 75.51 |
| <b>YL115</b> | YL-YL | CG<br>W | /    | 7.40 | 471.2 | 1.283  | 4.077 | 36.66 | 57.69 | 242.2 | 98.75 | 11.06 |
| <b>YL116</b> | YL-YL | CG<br>W | /    | 7.80 | 493.2 | 2.399  | 65.96 | 9.618 | 66.08 | 236.3 | 95.61 | 39.05 |
| <b>YL117</b> | YL-YL | CG<br>W | /    | 7.80 | 284.5 | 0.9864 | 8.337 | 12.23 | 47.06 | 166.1 | 39.55 | 7.425 |
| <b>YL118</b> | YL-YL | CG<br>W | /    | 7.90 | 346.7 | 0.8308 | 7.022 | 9.594 | 65.26 | 181.3 | 61.50 | 11.94 |
| <b>YL119</b> | YL-YL | CG<br>W | /    | 7.70 | 281.1 | 1.068  | 9.027 | 11.67 | 46.73 | 179.4 | 25.67 | 5.685 |

|              |       |         |      |      |       |        |        |       |       |       |        |       |
|--------------|-------|---------|------|------|-------|--------|--------|-------|-------|-------|--------|-------|
| <b>YL120</b> | YL-YL | CG<br>W | /    | 7.60 | 641.1 | 2.116  | 33.81  | 34.02 | 105.2 | 296.6 | 162.09 | 31.85 |
| <b>YL121</b> | YL-YL | CG<br>W | /    | 7.50 | 326.2 | 0.6549 | 0.9823 | 23.70 | 52.78 | 220.6 | 26.56  | 16.59 |
| <b>YL122</b> | YL-YL | CG<br>W | /    | 7.70 | 489.5 | 1.009  | 8.528  | 31.22 | 71.49 | 262.3 | 72.64  | 17.90 |
| <b>YL123</b> | YL-YL | CG<br>W | /    | 7.80 | 414.2 | 1.370  | 23.45  | 16.99 | 56.01 | 206.8 | 71.34  | 21.98 |
| <b>YL124</b> | YL-YL | CG<br>W | /    | 7.50 | 199.6 | 0.8326 | 8.418  | 3.385 | 36.56 | 104.6 | 27.71  | 9.026 |
| <b>YL125</b> | YL-YL | CG<br>W | /    | 7.90 | 323.6 | 1.628  | 17.11  | 13.83 | 47.57 | 201.0 | 37.26  | 15.57 |
| <b>YL126</b> | YL-YL | CG<br>W | /    | 8.00 | 454.1 | 2.232  | 43.51  | 12.20 | 67.00 | 214.2 | 102.4  | 28.50 |
| <b>YL127</b> | YL-YL | CG<br>W | /    | 8.00 | 230.8 | 0.6187 | 7.115  | 8.171 | 40.43 | 148.4 | 14.04  | 9.421 |
| <b>YL128</b> | YL-YL | CG<br>W | /    | 7.90 | 222.9 | 1.120  | 9.467  | 4.077 | 42.26 | 133.9 | 16.55  | 9.577 |
| <b>YL129</b> | YL-YL | CG<br>W | /    | 7.80 | 338.3 | 1.544  | 26.43  | 7.898 | 59.10 | 131.0 | 104.0  | 23.14 |
| <b>YL130</b> | YL-YL | CG<br>W | /    | 8.10 | 168.8 | 1.366  | 11.54  | 3.575 | 32.10 | 93.79 | 25.84  | 8.523 |
| <b>YL131</b> | YL-YL | CG<br>W | 14.8 | 8.10 | 246.5 | 0.6069 | 6.271  | 2.428 | 56.74 | 107.8 | 74.25  | 3.867 |
| <b>YL132</b> | YL-YL | CG<br>W | 25.1 | 8.20 | 291.3 | 1.140  | 8.209  | 22.12 | 41.16 | 138.3 | 82.89  | 3.777 |
| <b>YL133</b> | YL-YL | CG<br>W | 25.5 | 7.90 | 452.5 | 1.972  | 9.639  | 26.62 | 74.59 | 242.5 | 84.76  | 11.70 |
| <b>YL134</b> | YL-YL | CG<br>W | 13.5 | 8.00 | 334.5 | 1.112  | 6.229  | 10.79 | 66.85 | 197.1 | 59.86  | 8.189 |
| <b>YL135</b> | YL-YL | CG<br>W | 14.0 | 7.60 | 1507  | 17.75  | 105.0  | 69.51 | 189.7 | 421.6 | 582.0  | 71.64 |
| <b>YL136</b> | YL-YL | CG<br>W | 16.0 | 7.90 | 475.5 | 2.247  | 29.42  | 23.43 | 64.30 | 216.4 | 108.2  | 22.22 |
| <b>YL137</b> | YL-YL | CG<br>W | 15.6 | 7.80 | 523.4 | 2.012  | 28.06  | 26.79 | 74.66 | 301.0 | 80.28  | 11.08 |
| <b>YL138</b> | YL-YL | CG<br>W | 16.0 | 8.00 | 293.9 | 1.344  | 9.304  | 20.06 | 33.18 | 171.8 | 41.58  | 7.688 |
| <b>YL139</b> | YL-YL | CG<br>W | 23.4 | 8.00 | 466.4 | 1.961  | 35.49  | 27.64 | 40.88 | 275.1 | 59.01  | 10.86 |
| <b>YL140</b> | YL-YL | CG<br>W | 16.3 | 7.70 | 1869  | 4.912  | 243.7  | 115.5 | 144.7 | 298.0 | 782.4  | 227.2 |
| <b>YL141</b> | YL-YL | CG<br>W | 17.9 | 7.22 | 339.2 | 1.047  | 15.18  | 10.16 | 58.75 | 179.8 | 42.97  | 14.43 |

**Table S2.** Statistical summary of the physical and chemical parameters determined in each of the subdivided river basins (I to VIII) in north of the Tianshan Mountains, China. (Note: 1 water type: SFW or SW, surface water samples including river water, lake water, reservoirs water, pond water, stream water, snow, ice, rainfall, etc.; PGW or PW, phreatic groundwater samples with groundwater level depth < 50 m; CGW or CW, confined groundwater samples with groundwater level depth > 50 m or > 100 m. 2 Watershed: EQS, Erlqis watershed; YL, Yili watershed; JG: Junggar watershed; YL-TKS, Tekes Basin in Yili watershed; YL-GNS, Gongnais Basin in Yili; YL-KS, Kashi Basin in Yili; YL-

YL, Yili Basin in Yili; JG-THB, Tuha Basin in JG; JG-MNSTB, middle part of the north slope of Tianshan Mountains in JG; JG-ABB, Aibi Lake Basin in JG; JG-EMB, Ermin Basin in JG; WLGB, Wulungu Basin in JG. The specific location and distribution of each sampling site are shown in Fig. 3.)

| River basin            |         | pH   | TDS<br>(mg/L) | K <sup>+</sup><br>(meq/L) | Na <sup>+</sup><br>(meq/L) | Mg <sup>2+</sup><br>(meq/L) | Ca <sup>2+</sup><br>(meq/L) | HCO <sub>3</sub> <sup>-</sup><br>(meq/L) | SO <sub>4</sub> <sup>2-</sup><br>(meq/L) | Cl <sup>-</sup><br>(meq/L) |
|------------------------|---------|------|---------------|---------------------------|----------------------------|-----------------------------|-----------------------------|------------------------------------------|------------------------------------------|----------------------------|
| EQS-SFW<br>(n=12)      | Average | 7.61 | 93.60         | 0.0372                    | 0.2333                     | 0.2455                      | 0.7378                      | 0.6655                                   | 0.5078                                   | 0.1140                     |
|                        | Median  | 7.61 | 65.50         | 0.0344                    | 0.1525                     | 0.1847                      | 0.4631                      | 0.3981                                   | 0.1554                                   | 0.1057                     |
|                        | Min     | 7.00 | 24.60         | 0.0136                    | 0.0410                     | 0.0451                      | 0.1334                      | 0.1678                                   | 0.0359                                   | 0.0076                     |
|                        | Max     | 8.33 | 199.0         | 0.0791                    | 0.6266                     | 0.5480                      | 1.861                       | 1.483                                    | 1.9183                                   | 0.2397                     |
| EQS-PGW<br>(n=21)      | Average | 7.43 | 1103          | 0.0519                    | 9.098                      | 2.183                       | 5.672                       | 2.943                                    | 6.501                                    | 7.146                      |
|                        | Median  | 7.40 | 1080          | 0.0420                    | 4.662                      | 1.772                       | 5.001                       | 2.764                                    | 5.600                                    | 2.417                      |
|                        | Min     | 6.70 | 271.2         | 0.0155                    | 0.3057                     | 0.1134                      | 0.8036                      | 0.2817                                   | 0.4642                                   | 0.1471                     |
|                        | Max     | 8.05 | 2634          | 0.1379                    | 27.48                      | 6.118                       | 14.37                       | 6.166                                    | 19.65                                    | 25.57                      |
| EQS-CGW<br>(n=2)       | Average | 7.60 | 1299          | 0.0861                    | 7.873                      | 3.151                       | 8.303                       | 5.541                                    | 9.947                                    | 3.749                      |
|                        | Median  | 7.60 | 1299          | 0.0861                    | 7.873                      | 3.151                       | 8.303                       | 5.541                                    | 9.947                                    | 3.749                      |
|                        | Min     | 7.20 | 563.1         | 0.0667                    | 3.118                      | 1.073                       | 3.299                       | 2.812                                    | 3.319                                    | 1.618                      |
|                        | Max     | 8.00 | 2035          | 0.1054                    | 12.63                      | 5.230                       | 13.31                       | 8.270                                    | 16.58                                    | 5.880                      |
| JG-THB-SFW<br>(n=2)    | Average | 6.63 | 188.5         | 0.1188                    | 1.219                      | 0.4951                      | 0.6529                      | 1.695                                    | 0.5163                                   | 0.3841                     |
|                        | Median  | 6.63 | 188.5         | 0.1188                    | 1.219                      | 0.4951                      | 0.6529                      | 1.695                                    | 0.5163                                   | 0.3841                     |
|                        | Min     | 6.59 | 47.50         | 0.0429                    | 0.2483                     | 0.0811                      | 0.2465                      | 0.4326                                   | 0.0422                                   | 0.1738                     |
|                        | Max     | 6.66 | 329.6         | 0.1947                    | 2.189                      | 0.9091                      | 1.059                       | 2.957                                    | 0.9905                                   | 0.5944                     |
| JG-THB-PGW<br>(n=5)    | Average | 7.52 | 26936         | 3.476                     | 381.7                      | 23.53                       | 32.52                       | 2.869                                    | 100.7                                    | 336.4                      |
|                        | Median  | 7.60 | 10290         | 1.042                     | 126.0                      | 9.107                       | 23.71                       | 2.258                                    | 65.44                                    | 79.33                      |
|                        | Min     | 7.16 | 178.3         | 0.0196                    | 0.4519                     | 0.5202                      | 1.412                       | 0.5777                                   | 0.6092                                   | 0.3046                     |
|                        | Max     | 7.74 | 144230        | 21.81                     | 2159                       | 161.2                       | 176.1                       | 7.600                                    | 312.9                                    | 2058                       |
| JG-THB-CGW<br>(n=22)   | Average | 7.78 | 3201          | 0.2255                    | 35.69                      | 3.661                       | 9.218                       | 3.982                                    | 22.86                                    | 21.79                      |
|                        | Median  | 7.79 | 1774          | 0.1085                    | 17.07                      | 3.002                       | 6.625                       | 2.882                                    | 14.16                                    | 9.474                      |
|                        | Min     | 7.37 | 999.7         | 0.0340                    | 7.483                      | 0.2339                      | 2.172                       | 1.090                                    | 7.739                                    | 2.135                      |
|                        | Max     | 8.20 | 19080         | 1.225                     | 246.5                      | 8.318                       | 31.36                       | 27.68                                    | 131.7                                    | 157.9                      |
| JG-MNSTB-SFW<br>(n=28) | Average | 8.08 | 268.1         | 0.0569                    | 0.5826                     | 0.8263                      | 2.236                       | 1.869                                    | 1.391                                    | 0.4309                     |
|                        | Median  | 8.08 | 268.4         | 0.0506                    | 0.5026                     | 0.7900                      | 2.273                       | 1.943                                    | 1.168                                    | 0.3379                     |
|                        | Min     | 7.26 | 90.00         | 0.0103                    | 0.0416                     | 0.1135                      | 0.7024                      | 0.5288                                   | 0.2778                                   | 0.0922                     |
|                        | Max     | 9.00 | 556.4         | 0.2321                    | 1.365                      | 2.336                       | 4.661                       | 3.932                                    | 3.491                                    | 1.4954                     |
| JG-MNSTB-PGW<br>(n=24) | Average | 8.29 | 3598          | 0.0949                    | 55.87                      | 3.224                       | 2.360                       | 2.279                                    | 3.839                                    | 55.61                      |
|                        | Median  | 8.20 | 820.0         | 0.0484                    | 8.396                      | 1.650                       | 1.228                       | 1.943                                    | 2.819                                    | 2.806                      |
|                        | Min     | 6.15 | 210.0         | 0.0080                    | 0.9614                     | 0.0040                      | 0.1544                      | 0.0035                                   | 0.1131                                   | 0.2591                     |
|                        | Max     | 9.70 | 14985         | 0.3805                    | 242.7                      | 12.24                       | 14.32                       | 9.976                                    | 19.29                                    | 254.7                      |
| JG-MNSTB-CGW<br>(n=41) | Average | 7.95 | 401.2         | 0.0505                    | 1.955                      | 0.9629                      | 2.624                       | 2.480                                    | 2.002                                    | 1.142                      |
|                        | Median  | 7.95 | 350.0         | 0.0502                    | 1.481                      | 0.8347                      | 2.374                       | 2.464                                    | 1.531                                    | 0.7167                     |
|                        | Min     | 7.40 | 155.6         | 0.0169                    | 0.3340                     | 0.0326                      | 0.1619                      | 0.1748                                   | 0.3515                                   | 0.2037                     |
|                        | Max     | 8.80 | 900.0         | 0.0839                    | 7.652                      | 3.326                       | 7.290                       | 5.559                                    | 6.407                                    | 7.120                      |
| JG-ABB-SFW<br>(n=6)    | Average | 8.23 | 1038          | 0.3518                    | 5.753                      | 8.938                       | 1.315                       | 2.988                                    | 9.878                                    | 3.585                      |
|                        | Median  | 8.35 | 1047          | 0.3593                    | 5.525                      | 8.916                       | 1.193                       | 3.033                                    | 9.980                                    | 3.615                      |
|                        | Min     | 7.40 | 192.4         | 0.0236                    | 0.1463                     | 0.7346                      | 0.3628                      | 1.589                                    | 0.5697                                   | 0.0994                     |
|                        | Max     | 8.76 | 1850          | 0.7044                    | 11.69                      | 17.72                       | 2.155                       | 4.298                                    | 19.02                                    | 7.122                      |
| JG-ABB-PGW(n=3)        | Average | 8.78 | 308.9         | 0.0471                    | 3.606                      | 0.1584                      | 0.8503                      | 0.2446                                   | 2.820                                    | 1.516                      |
|                        | Median  | 9.36 | 380.7         | 0.0601                    | 5.030                      | 0.0119                      | 0.5581                      | 0.0277                                   | 3.763                                    | 1.771                      |
|                        | Min     | 7.51 | 160.3         | 0.0152                    | 0.3002                     | 0.0104                      | 0.4885                      | 0.0033                                   | 0.719                                    | 0.8975                     |
|                        | Max     | 9.48 | 385.7         | 0.0660                    | 5.489                      | 0.4528                      | 1.504                       | 0.7028                                   | 3.977                                    | 1.880                      |

|                      |         |      |       |        |        |        |        |        |        |        |
|----------------------|---------|------|-------|--------|--------|--------|--------|--------|--------|--------|
| JG-ABB-CGW<br>(n=19) | Average | 8.10 | 466.5 | 0.0542 | 3.674  | 1.045  | 1.937  | 2.116  | 2.957  | 1.674  |
|                      | Median  | 8.00 | 289.4 | 0.0500 | 1.524  | 0.5589 | 1.741  | 1.811  | 1.690  | 0.8055 |
|                      | Min     | 7.40 | 143.1 | 0.0140 | 0.1989 | 0.1040 | 0.2025 | 1.333  | 0.4113 | 0.1602 |
|                      | Max     | 8.60 | 1450  | 0.1285 | 15.72  | 2.984  | 4.006  | 4.629  | 12.01  | 8.825  |
| JG-EMB-SWF<br>(n=3)  | Average | 8.24 | 2244  | 0.5248 | 25.24  | 4.523  | 1.140  | 9.797  | 15.13  | 5.172  |
|                      | Median  | 7.60 | 331.0 | 0.1010 | 1.489  | 1.833  | 1.123  | 3.414  | 1.281  | 0.7386 |
|                      | Min     | 7.30 | 201.0 | 0.0248 | 0.6772 | 0.5408 | 0.9174 | 1.154  | 0.2613 | 0.2659 |
|                      | Max     | 9.81 | 6200  | 1.449  | 73.55  | 11.19  | 1.380  | 24.82  | 43.85  | 14.51  |
| JG-EMB-PGW<br>(n=5)  | Average | 8.04 | 1634  | 0.1313 | 24.16  | 1.903  | 1.516  | 1.142  | 1.893  | 24.21  |
|                      | Median  | 7.74 | 239.7 | 0.0366 | 0.6540 | 0.9269 | 1.412  | 1.584  | 1.015  | 0.3699 |
|                      | Min     | 7.60 | 178.3 | 0.0196 | 0.4519 | 0.5202 | 1.330  | 0.0640 | 0.6092 | 0.3046 |
|                      | Max     | 8.86 | 3773  | 0.2965 | 60.35  | 3.788  | 1.982  | 2.029  | 3.572  | 61.26  |
| JG-EMB-CGW<br>(n=10) | Average | 7.89 | 560.9 | 0.0566 | 3.164  | 1.944  | 2.771  | 3.456  | 3.356  | 1.060  |
|                      | Median  | 7.90 | 459.8 | 0.0625 | 2.143  | 1.328  | 2.883  | 2.941  | 2.541  | 0.7196 |
|                      | Min     | 7.60 | 127.5 | 0.0030 | 0.0040 | 0.2837 | 1.390  | 1.129  | 0.2150 | 0.3353 |
|                      | Max     | 8.10 | 1608  | 0.0952 | 11.40  | 8.457  | 4.046  | 9.320  | 11.03  | 3.804  |
| JG-WLGB-SFW<br>(n=5) | Average | 8.02 | 1750  | 1.014  | 17.35  | 4.345  | 2.182  | 6.022  | 10.19  | 8.776  |
|                      | Median  | 8.02 | 2040  | 1.277  | 21.63  | 5.656  | 2.159  | 4.857  | 11.13  | 10.75  |
|                      | Min     | 7.66 | 321.0 | 0.0801 | 1.422  | 0.9335 | 1.508  | 0.9958 | 2.949  | 0.8106 |
|                      | Max     | 8.48 | 2940  | 1.729  | 28.82  | 7.016  | 2.959  | 12.69  | 15.61  | 13.36  |
| YL-TKS-SFW<br>(n=16) | Average | 7.85 | 149.9 | 0.0395 | 0.3089 | 0.4619 | 1.249  | 0.9871 | 0.8840 | 0.2121 |
|                      | Median  | 7.84 | 123.1 | 0.0361 | 0.1374 | 0.3417 | 1.088  | 0.9447 | 0.5398 | 0.0869 |
|                      | Min     | 7.17 | 84.00 | 0.0144 | 0.0725 | 0.1887 | 0.7819 | 0.7178 | 0.2977 | 0.0161 |
|                      | Max     | 8.49 | 590.0 | 0.1089 | 2.774  | 2.237  | 3.136  | 1.518  | 5.055  | 2.052  |
| YL-GNS-SFW<br>(n=10) | Average | 7.82 | 359.9 | 0.0400 | 1.638  | 1.143  | 2.220  | 1.967  | 2.116  | 1.033  |
|                      | Median  | 7.83 | 231.2 | 0.0333 | 0.4269 | 0.7296 | 1.882  | 1.796  | 1.065  | 0.1966 |
|                      | Min     | 7.27 | 95.00 | 0.0083 | 0.0942 | 0.1337 | 0.9220 | 0.6567 | 0.5062 | 0.0418 |
|                      | Max     | 8.58 | 1020  | 0.1179 | 7.037  | 3.684  | 4.509  | 4.364  | 7.217  | 5.066  |
| YL-GNS-PGW<br>(n=24) | Average | 7.61 | 705.3 | 0.1639 | 3.017  | 2.510  | 4.068  | 5.199  | 3.431  | 1.217  |
|                      | Median  | 7.60 | 627.2 | 0.0468 | 1.392  | 2.238  | 3.763  | 4.807  | 2.458  | 1.039  |
|                      | Min     | 7.06 | 320.7 | 0.0145 | 0.3686 | 0.7792 | 1.994  | 2.749  | 0.3117 | 0.1103 |
|                      | Max     | 8.04 | 1440  | 1.489  | 13.56  | 7.848  | 9.154  | 9.511  | 11.96  | 4.266  |
| YL-KS-SFW<br>(n=9)   | Average | 7.75 | 183.0 | 0.0398 | 0.7677 | 0.5402 | 1.289  | 1.083  | 1.146  | 0.3741 |
|                      | Median  | 7.80 | 134.4 | 0.0347 | 0.1775 | 0.3196 | 1.189  | 0.9999 | 0.5940 | 0.1120 |
|                      | Min     | 7.16 | 58.70 | 0.0166 | 0.0700 | 0.0800 | 0.5479 | 0.4619 | 0.2628 | 0.0202 |
|                      | Max     | 8.04 | 680.0 | 0.1062 | 5.511  | 2.492  | 2.688  | 1.807  | 5.973  | 2.562  |
| YL-YL-SFW<br>(n=16)  | Average | 7.79 | 312.0 | 0.0542 | 0.9501 | 1.134  | 2.274  | 1.945  | 1.824  | 0.6085 |
|                      | Median  | 7.84 | 306.8 | 0.0484 | 1.045  | 1.012  | 2.077  | 1.674  | 1.713  | 0.6124 |
|                      | Min     | 7.25 | 126.0 | 0.0119 | 0.0834 | 0.2963 | 1.191  | 0.4744 | 0.5224 | 0.0550 |
|                      | Max     | 8.41 | 528.6 | 0.1148 | 2.148  | 2.202  | 4.688  | 3.717  | 4.485  | 1.272  |
| YL-YL-PGW<br>(n=35)  | Average | 7.58 | 751.1 | 0.1111 | 2.593  | 3.039  | 4.686  | 5.265  | 3.783  | 1.402  |
|                      | Median  | 7.60 | 700.5 | 0.0650 | 1.735  | 3.006  | 4.772  | 5.493  | 3.004  | 0.9191 |
|                      | Min     | 6.80 | 119.7 | 0.0163 | 0.0493 | 0.3423 | 1.122  | 1.204  | 0.3541 | 0.0425 |
|                      | Max     | 8.10 | 1646  | 0.9426 | 11.49  | 8.068  | 10.14  | 8.896  | 13.24  | 5.103  |
| YL-YL-CGW<br>(n=31)  | Average | 7.79 | 480.6 | 0.0533 | 1.369  | 1.892  | 3.323  | 3.461  | 2.397  | 0.8080 |
|                      | Median  | 7.80 | 346.7 | 0.0349 | 0.5022 | 1.398  | 2.932  | 3.294  | 1.485  | 0.3368 |
|                      | Min     | 7.22 | 168.8 | 0.0155 | 0.0427 | 0.1998 | 1.333  | 1.537  | 0.2923 | 0.1065 |
|                      | Max     | 8.20 | 1869  | 0.4539 | 10.60  | 9.503  | 9.467  | 6.909  | 16.29  | 6.408  |
